# Supplementary material for: Transcriptional Association between mRNAs and Their Paired Natural Antisense Transcripts Following Fusarium oxysporum Inoculation in Brassica rapa L.
Source: MDPI journal article supplement (doi:10.3390/horticulturae8010017), 2021-12-23
Supplement: s1 [file s1]

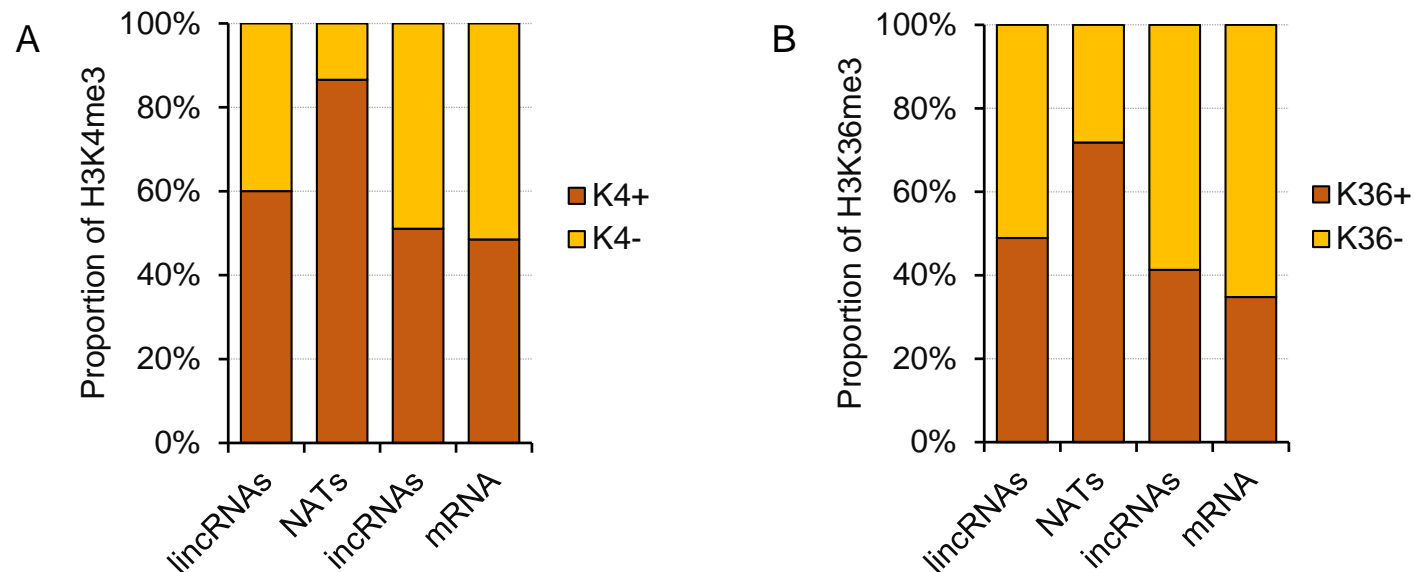

Figure S1. Proportion of each type of lncRNAs and mRNAs with (+) or without (-) H3K4me3 (A) and H3K36me3 (B) marks on the coding region in RJKB-T24. K4 and K36 represent H3K4me3 and H3K36me3, respectively.

Bra034404

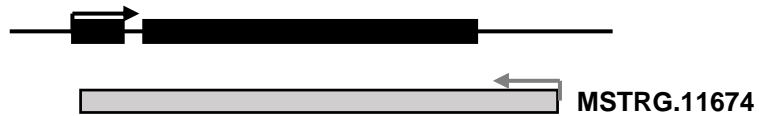

Bra020438

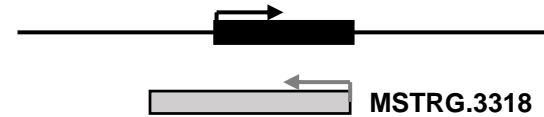

Bra003511

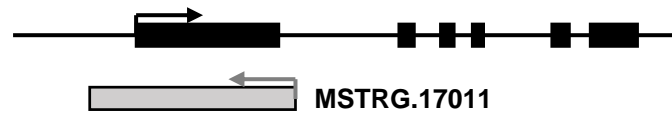

Bra029946

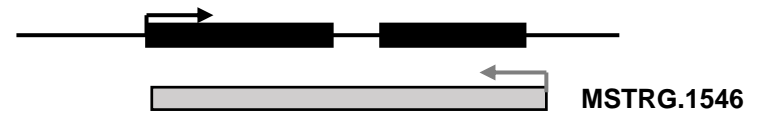

Bra039006

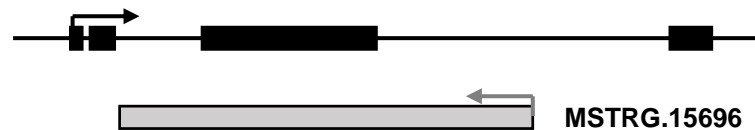

Figure S2. Structure of genes and their paired NATs. Black and gray boxes represent the exon regions of the genes and NATs, respectively. Arrows represent the direction of transcription.
