# Supplementary material for: Transcriptional Association between mRNAs and Their Paired Natural Antisense Transcripts Following Fusarium oxysporum Inoculation in Brassica rapa L.
Source: MDPI journal article supplement (doi:10.3390/horticulturae8010017), 2021-12-23
Supplement: s1 [file s1]

Archive with 2 entries (2 files):
- horticulturae-1507582-Supplemental figure-revised-Akter et al.pdf
- horticulturae-1507582-Supplemental tables-revised-Aktter et al..xlsx
