# Supplementary material for: Transcriptional Association between mRNAs and Their Paired Natural Antisense Transcripts Following Fusarium oxysporum Inoculation in Brassica rapa L.
Source: MDPI journal article supplement (doi:10.3390/horticulturae8010017), 2021-12-23
Supplement: s1 [file s1 › horticulturae-1507582-Supplemental tables-revised-Aktter et al..xlsx]

## Sheet: Table S1
Table S1. Sequence of primers used in this study
Name	Forward primer (5'-3')	Reverse primer (5'-3')
For qPCR
Bra025668	ACACGCTCTTCTCCACTCAC	AAAGCCTCCTCGATGCTAAT
Bra033549	CGAGCGTATTACACGAACCT	GGGAAAAACAAACCGAAGTT
Bra028523	AACCCCTGGAAATTCAACTC	TGTTCTTTTTCCCTCCTCCT
Bra035320	GAGCTCACGAAATCAGTCGT	ACTCCTCCGCTCTTTCAAAT
Bra029414	GTCTCTCCGAAGTTTCTCAG	GCATGCCAAAGAACTCATGT
Bra009234	ACCGCCCTAACCATATTTTC	TCCGGAGATACTTGAGCTTG
MSTRG.13790	CACGTTGTTGGTAAACTAGTATAC	CAGAGATGATGGTTTGTGTTTCTC
MSTRG.1355	CTGGAAATAGATGGATTATCACTC	CGGTTTTGAGAATTTATAAACCC
MSTRG.16709	CTCTTTTTAAGTTTCTGGTTCTG	GGGAACTTTAGTCTGTCTTC
MSTRG.26084	GAATATACCAGCTCGGCCGG	GAATATACCAGCTCGGCCGG
MSTRG.4734	CACATACACGATGCACATAG	CTTCGGAGAGACGTGGACGGTC
MSTRG.25721	CCTGCTTGCATGAAAAGTTTC	CTCCAGTGGGTAGACCTTTCC
Reference for qPCR
Bractin	CGGTCCAGCTTCGTCATACTCAGCC	AAATGTGATGTGGATATCAGGAAGG
For ChIP-qPCR
Bra033549.MSTRG.1355	CAAACGGCGGAAACGCTGCGAG	CCGAAGTTCTTCTCGATCTCAGG
Bra016382.MSTRG.19710	CGAACTGTAAGTTCTGTCGCG	GAACCACGCTTAGGCTCAGTCG
WRKY48	CACAGAGACCAAGATAGATCACC	TTCCCAGCTAGCTCCAACTGATG
Reference for ChIP-qPCR
Bra011336	GGGAATCAGCTTTTGTGGTG	AAATGACCCGATCAGCAAAG

## Sheet: Table S2
Table S2. Expression levels of six mRNAs and their paired NATs
mRNAs and their paired NATs	RJKB-T23 (I/NI)			RJKB-T24 (I/NI)
	24 HAI	72 HAI		24 HAI	72 HAI
Bra025668	Up	Up		Up	Up
MSTRG.13709	Up	Up		No	Up
Bra033549	Up	Up		Up	Up
MSTRG.1355	Up	Up		Up	Up
Bra028523	Up	Up		Up	Up
MSTRG.16709	Up	No		Up	Up
Bra035320	Up	Up		Up	Up
MSTRG. 26084	No	No		No	Up
Bra029414	Up	Up		Up	Up
MSTRG. 4734	Up	Up		No	Down
Bra009234	Up	Up		UP	Up
MSTRG. 25721	Up	Up		Up	No
Up, Down, and No represent the upregulation, downregulation, and no difference of expression levels following Fusarium oxysporum inoculation, respectively.

## Sheet: Sheet3
Table S3. Correlation coefficient of expression levels between mRNAs and their paired NATs
mRNAs and their paired NATs	Correlation coefficient	p value
Pair basis (four comparisons, 24 HAI and 72 HAI in two lines)
Bra025668-MSTRG. 13790	-0.43	NS
Bra033549-MSTRG.1355	0.94	NS
Bra028523-MSTRG.16709	0.03	NS
Bra035320-MSTRG. 26084	0.53	NS
Bra029414-MSTRG. 4734	0.73	NS
Bra009234-MSTRG. 25721	0.31	NS
Condition basis (six comparisons, six mRNAs and NATs pairs)
RJKB-T23-24HAI	-0.27	NS
RJKB-T23-72HAI	0.87	*
RJKB-T24-24HAI	-0.32	NS
RJKB-T24-72HAI	0.99	***
All
Six pairs and four conditions	0.69	***
*, p < 0.05; ***, p < 0.001; NS, p > 0.05
